# Supplementary material for: Photodynamic Activity of Protoporphyrin IX-Immobilized Cellulose Monolith for Nerve Tissue Regeneration
Source: MDPI journal article supplement (doi:10.3390/ijms23031035), 2022-01-18
Supplement: s1 [file s1]

## Supplementary Information

### Photodynamic Activity of Protoporphyrin IX-Immobilized Cellulose Monolith for Nerve Tissue Regeneration

Ji Hye Lee, Ki Hong Kim, Oh Hyeong Kwon, Oh Kyoung Kwon, Hiroshi Uyama\*, Young-Jin Kim\*

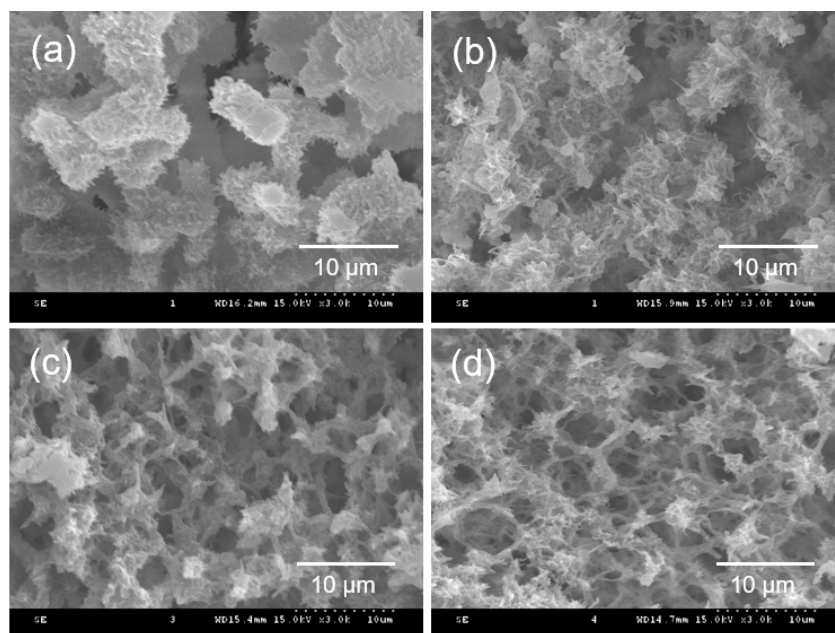

**Figure S1.** SEM images of CA monoliths fabricated with various CA concentrations; (a) 6 w/v%, (b) 8 w/v%, (c) 10 w/v%, and (d) 12 w/v%.

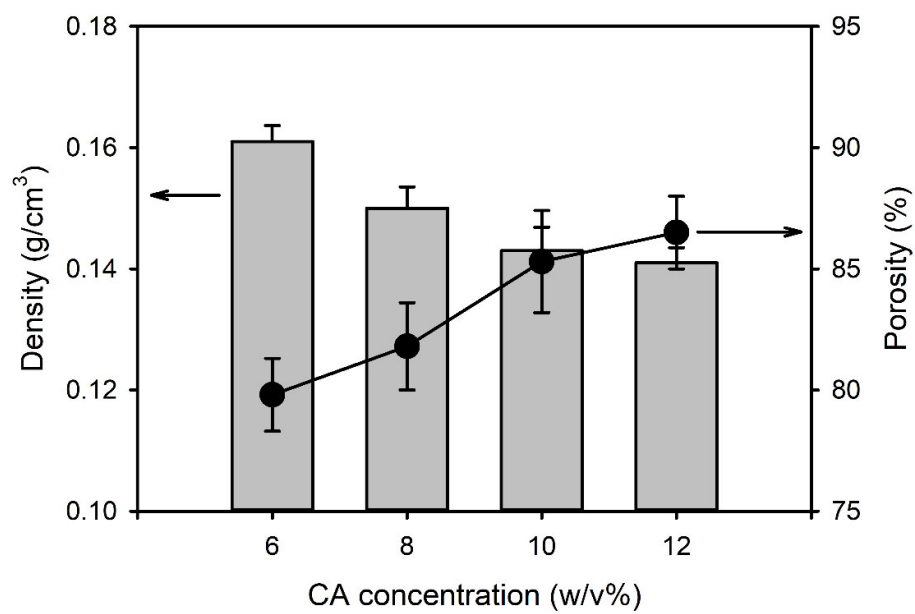

**Figure S2.** Density and porosity of CA monoliths with different CA concentrations.

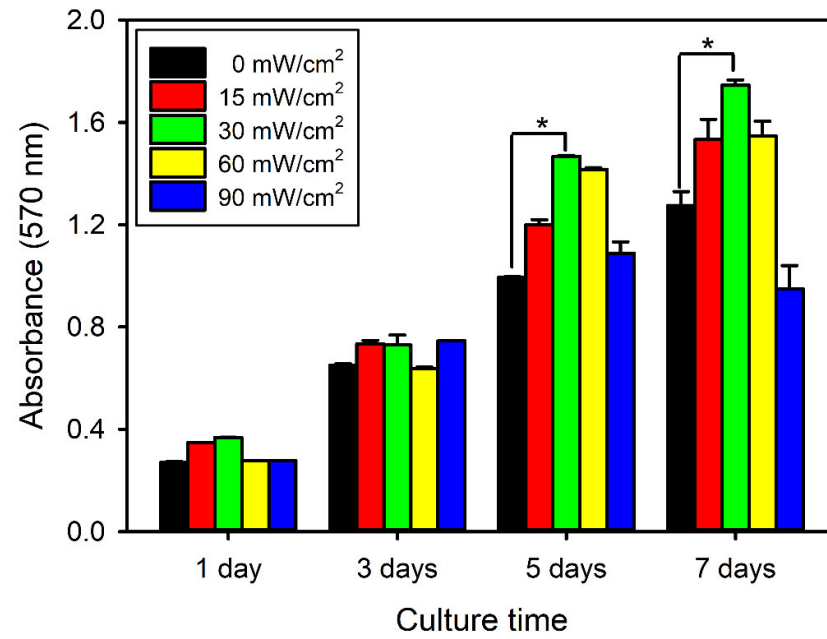

**Figure S3.** Proliferation behaviors of S16 cells cultured on the CEPP20 monolith upon laser irradiation with different laser intensity ( $n = 5$ ).  $p^* < 0.05$  for the comparison between two treatment groups.
